# Supplementary material
Source: Springer Nature journal article supplement (https://www.springermedizin.de/resource/supplementary/12958_2010_811_MOESM6_ESM.pdf/9568904)

Calf follicle

Cow follicle

BMP15

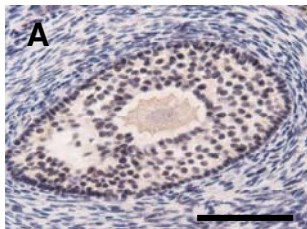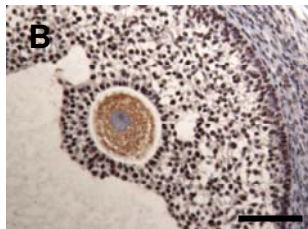

GDF9

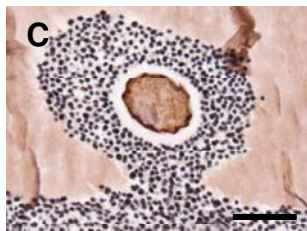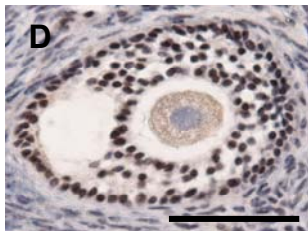

Preimmuno  
serum

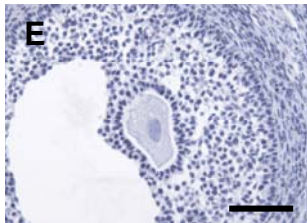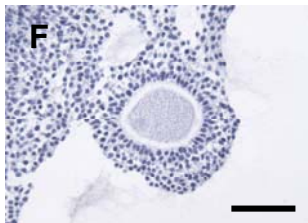

Supplement: MOESM6 [file 9568904]
